# Supplementary material for: The mRNA-LNP platform’s lipid nanoparticle component used in preclinical vaccine studies is highly inflammatory
Source: PubMed Central journal article supplement — bioRxiv. 2021 Jul 23:2021.03.04.430128. Originally published 2021 Mar 4. Preprint. [Version 2] doi: 10.1101/2021.03.04.430128 (PMC7941620; doi:10.1101/2021.03.04.430128), 2021-07-23

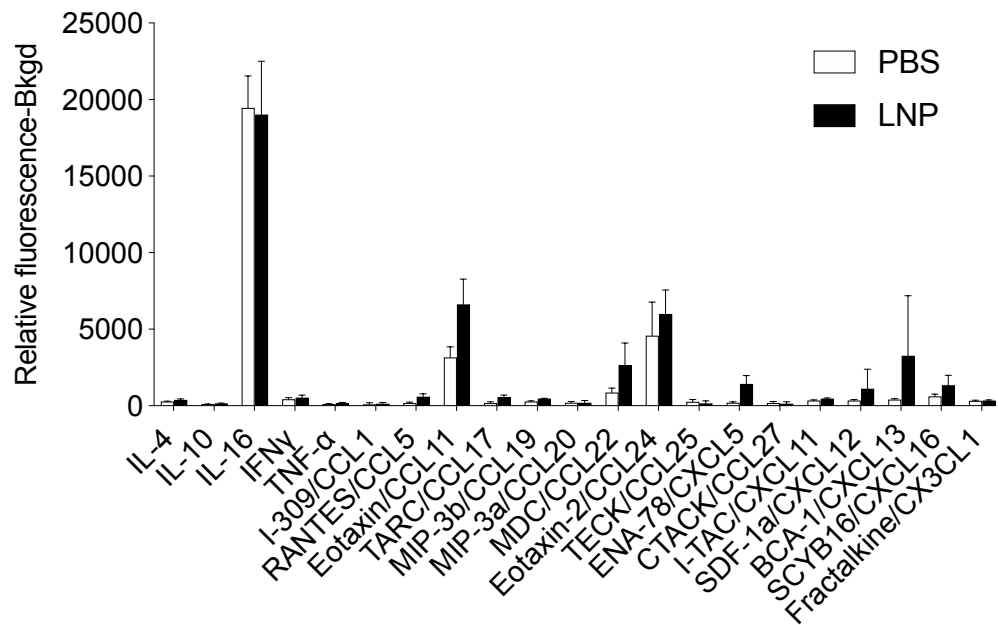

Supplement: media-2.pdf [file media-2.pdf]
